# Supplementary material for: Unusual Lattice Parameters Behavior for La1.9Ca0.1NiO4+δ at the Temperatures below Oxygen Loss
Source: MDPI journal article supplement (doi:10.3390/cryst12030344), 2022-03-02
Supplement: s1 [file s1]

Article

# Unusual Lattice Parameters Behavior for $\text{La}_{1.9}\text{Ca}_{0.1}\text{NiO}_{4+\delta}$ at the Temperatures Below Oxygen Loss

Denis Mishchenko<sup>1</sup>, Zakhar Vinokurov<sup>1,\*</sup>, Evgeny Gerasimov<sup>2</sup>, Elena Filonova<sup>3</sup>, Alexander Shmakov<sup>1</sup> and Elena Pikalova<sup>4,5</sup>

<sup>1</sup> Synchrotron Radiation Facility SKIF, Boreskov Institute of Catalysis, SB RAS, 630559 Kol'tsovo, Russia; q14999@yandex.ru (D.M.); highres@mail.ru (A.S.)

<sup>2</sup> Federal Research Center Boreskov Institute of Catalysis, SB RAS, 630090 Novosibirsk, Russia; gerasimov@catalysis.ru

<sup>3</sup> Department of Physical and Inorganic Chemistry, Institute of Natural Sciences and Mathematics, Ural Federal University, 620002 Yekaterinburg, Russia; elena.filonova@urfu.ru

<sup>4</sup> Laboratory of Solid Oxide Fuel Cells, Institute of High Temperature Electrochemistry, UB RAS, 620002 Yekaterinburg, Russia; e.pikalova@list.ru

<sup>5</sup> Department of Environmental Economics, Institute of Economics and Management, Ural Federal University, 620002 Yekaterinburg, Russia

\* Correspondence: vinokurovzs@catalysis.ru

## Supplementary Materials

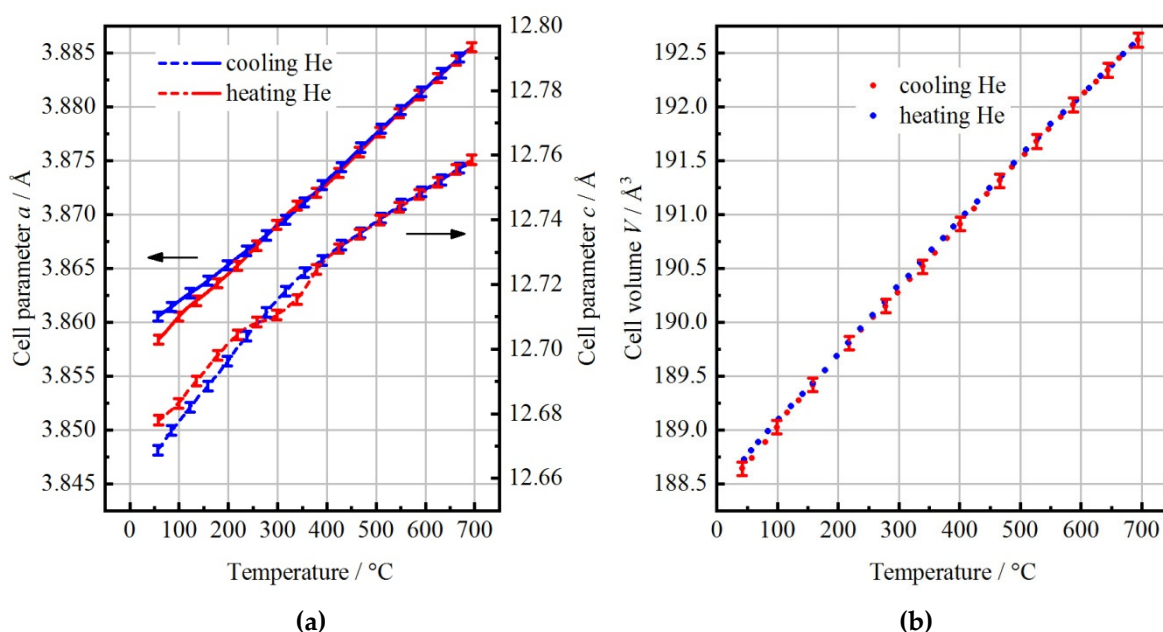

**Figure S1.** Lattice parameters  $a$ ,  $c$  (a) and volume (b) as a function of temperature, obtained from XRD patterns for  $\text{La}_{2}\text{NiO}_{4.17}$  collected in He flow.

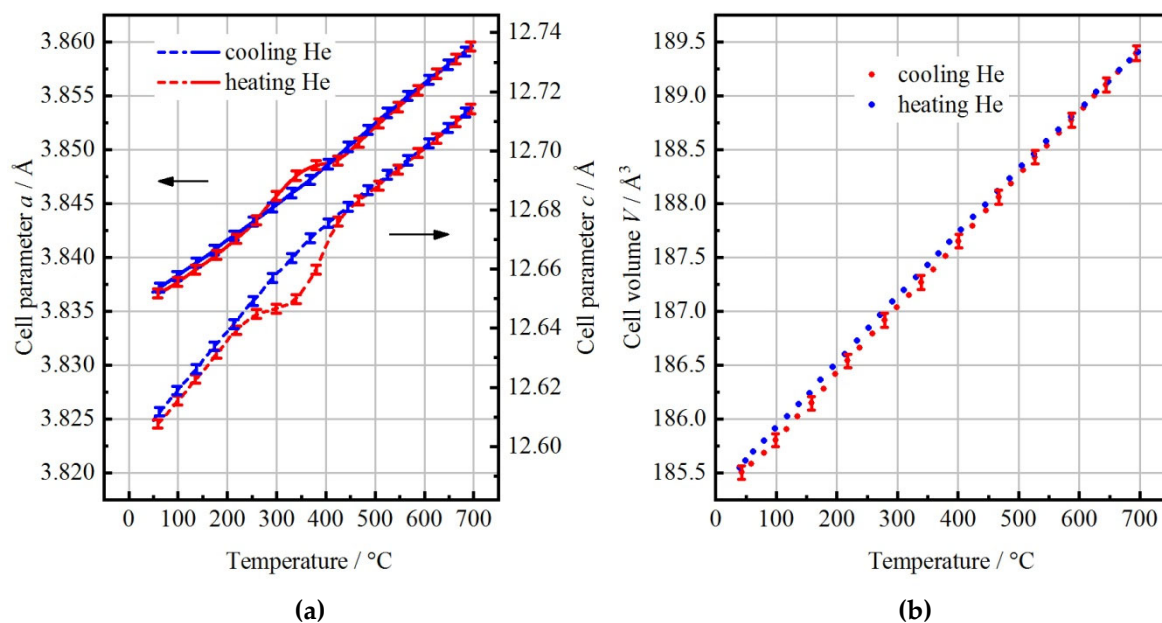

**Figure S2.** Lattice parameters  $a$ ,  $c$  (a) and volume (b) as a function of temperature, obtained from XRD patterns for  $\text{La}_{1.8}\text{Ca}_{0.2}\text{NiO}_{4.09}$  collected in He flow.

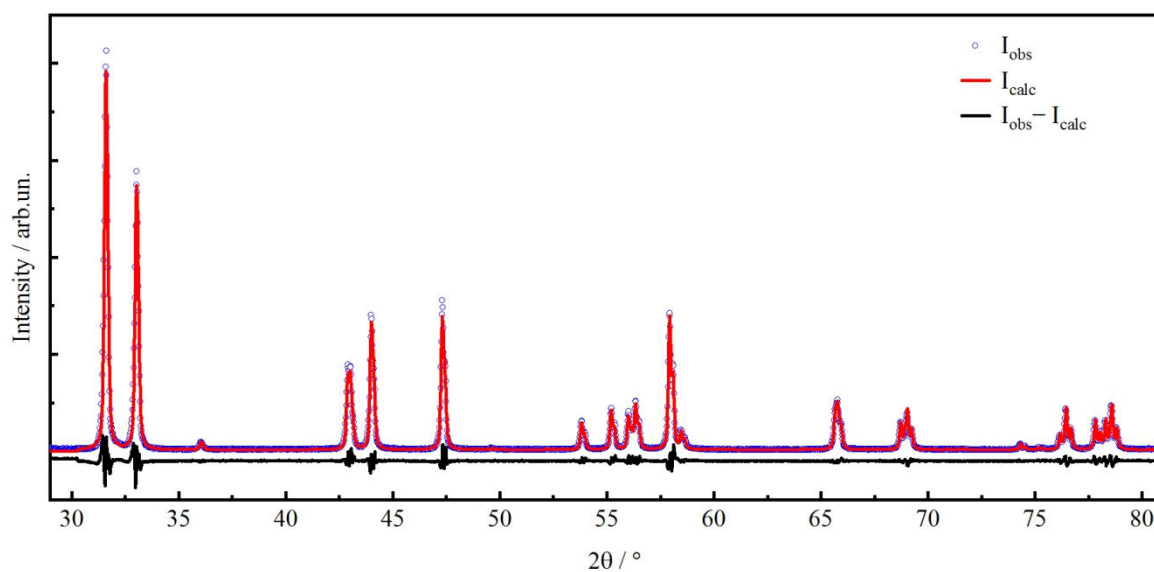

**Figure S3.** Rietveld refinement results of as-prepared LCNO\_01 sample.

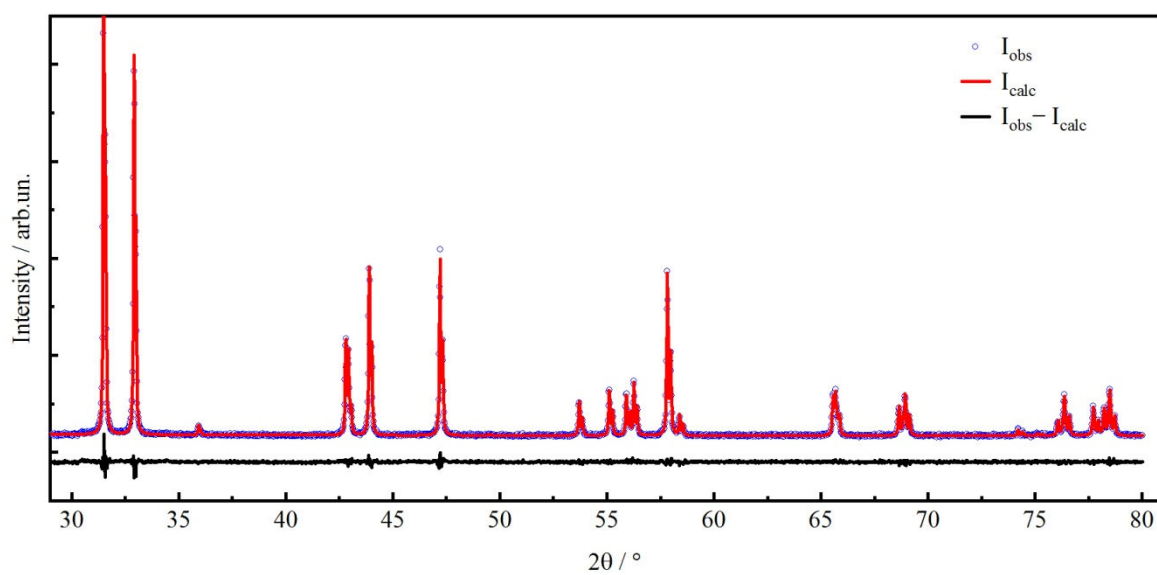

Figure S4. Rietveld refinement results of quenched LCNO<sub>01\_q</sub> sample.

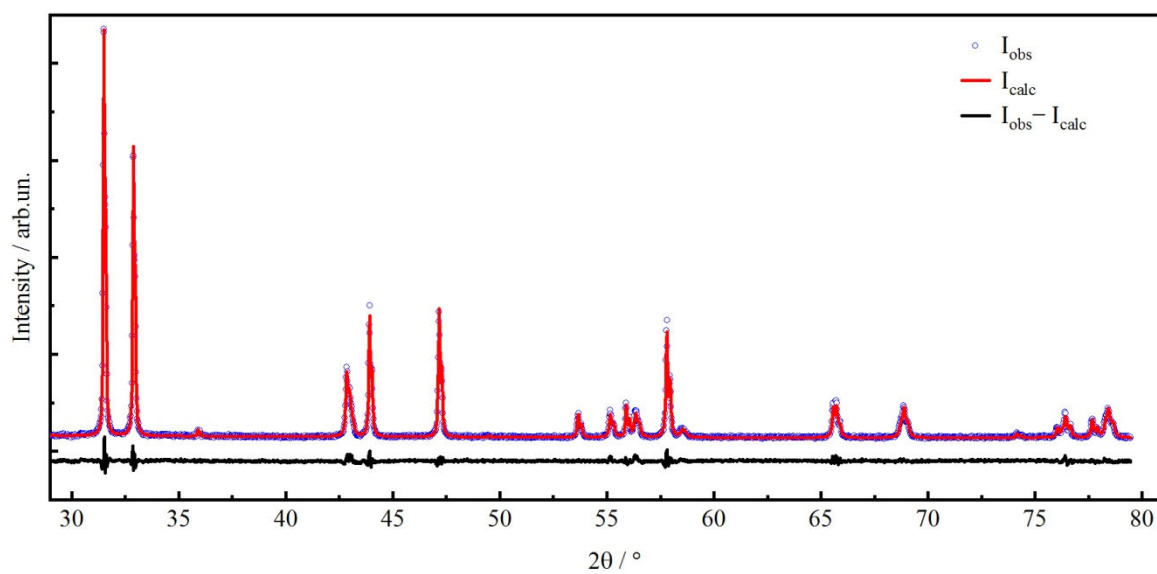

Figure S5. Rietveld refinement results of tempered LCNO<sub>01\_t</sub> sample.

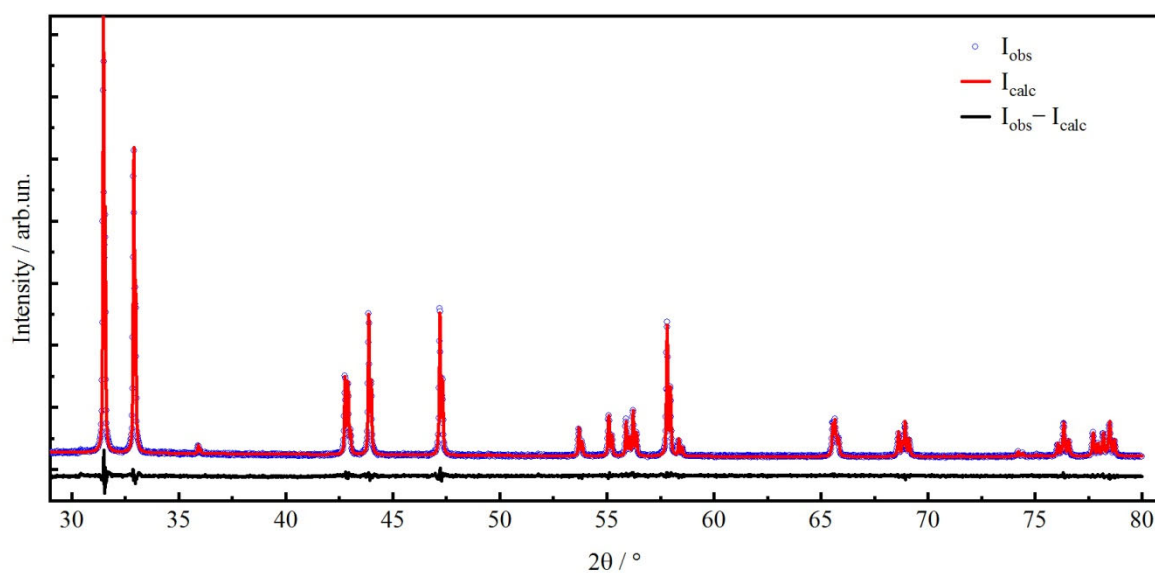

**Figure S6.** Rietveld refinement results of calcined at 700 °C in air LCNO\_01\_700 sample.

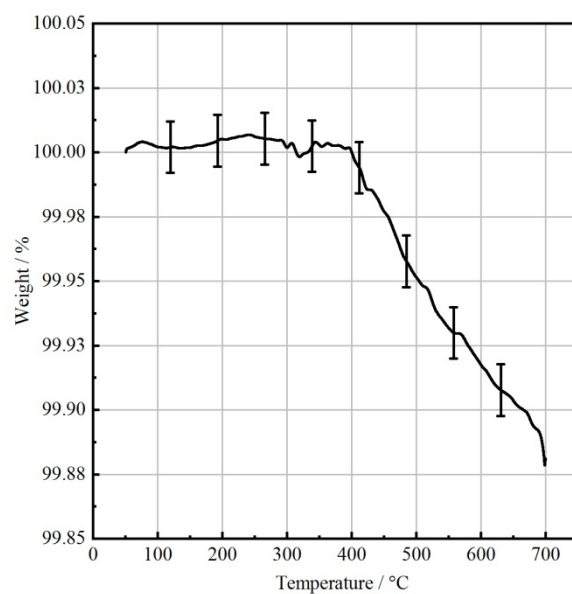

**Figure S7.** Weight loss curve obtained by TGA for LCNO\_01\_q sample.

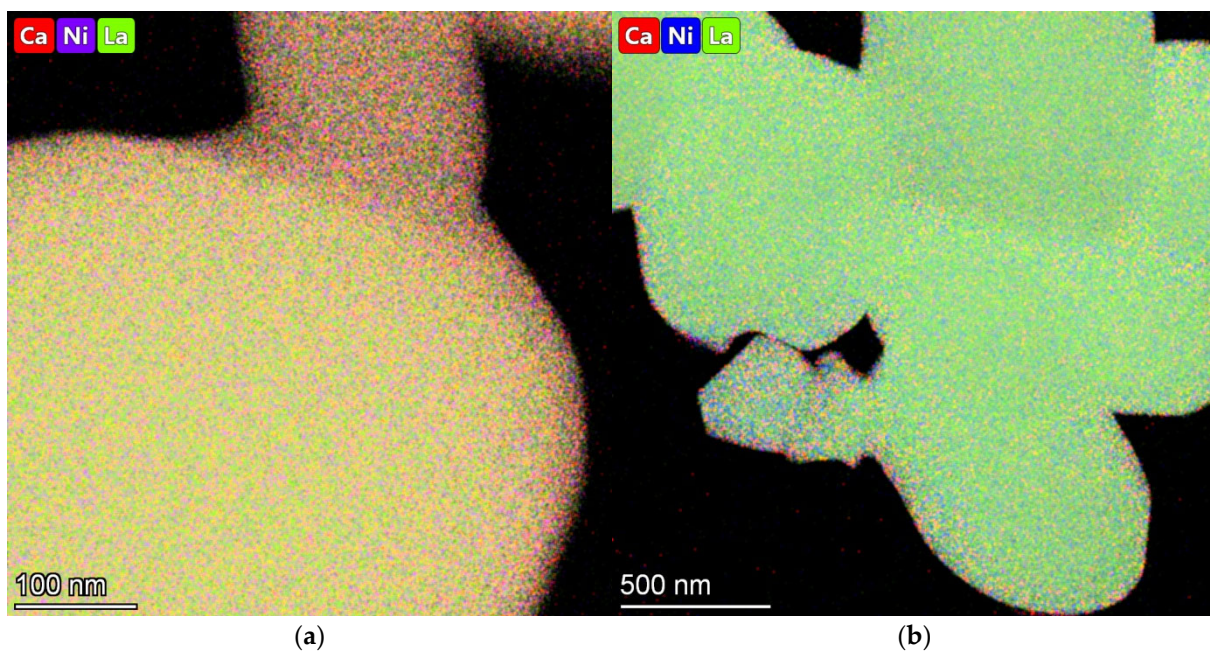

**Figure S8.** EDS mapping patterns of Ca, Ni and La for LCNO\_01\_q sample – (a,b).

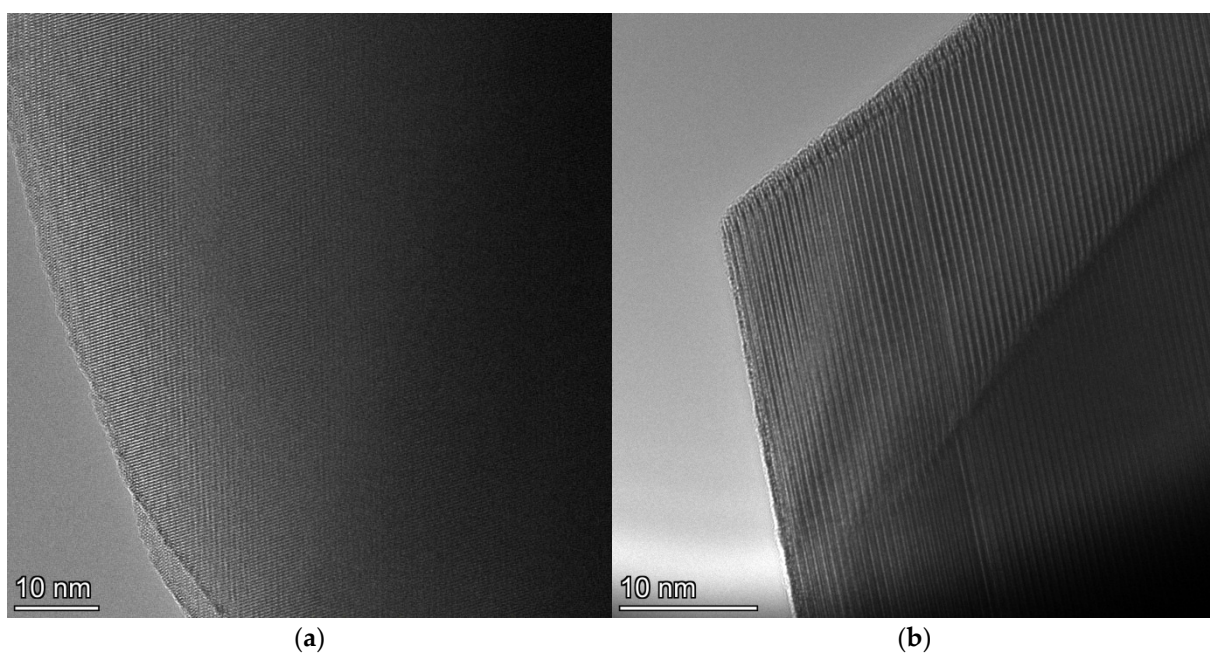

**Figure S9.** HRTEM image of LCNO\_01\_q sample – (a); occasional stacking faults in the lattice of LCNO\_01\_q sample – (b).



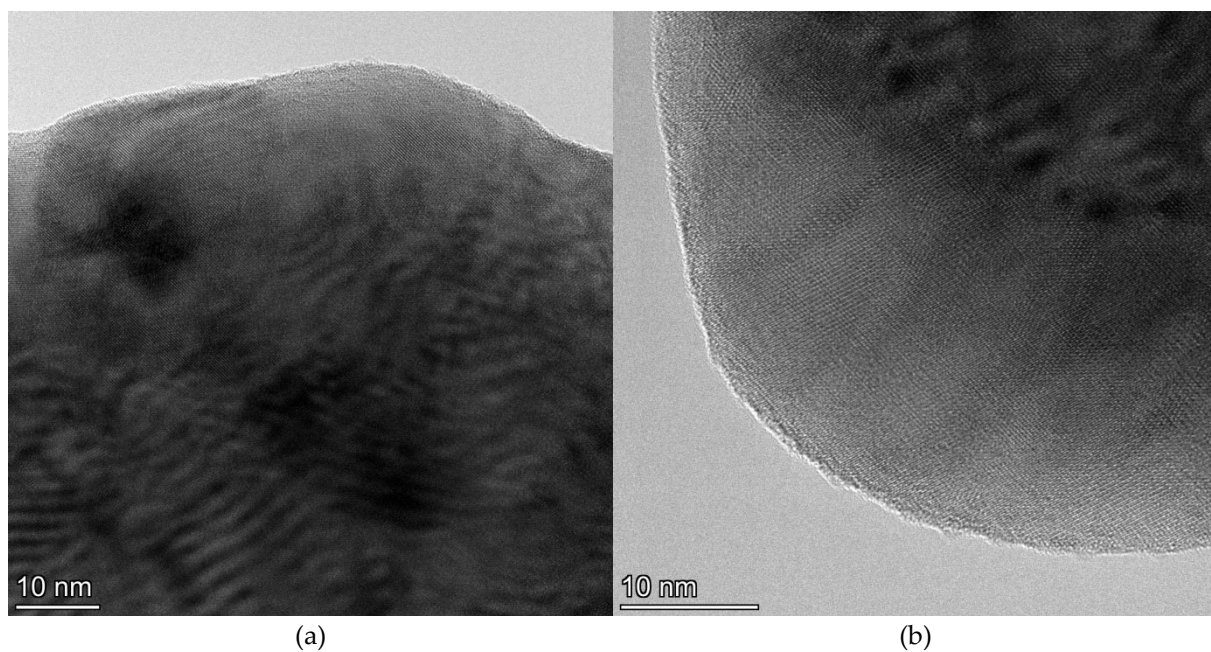

**Figure S10.** HRTEM images of LCNO\_01\_t sample showing amorphization and nano-sized particles on the surface as well as disorientated planar defects – (a), (b).

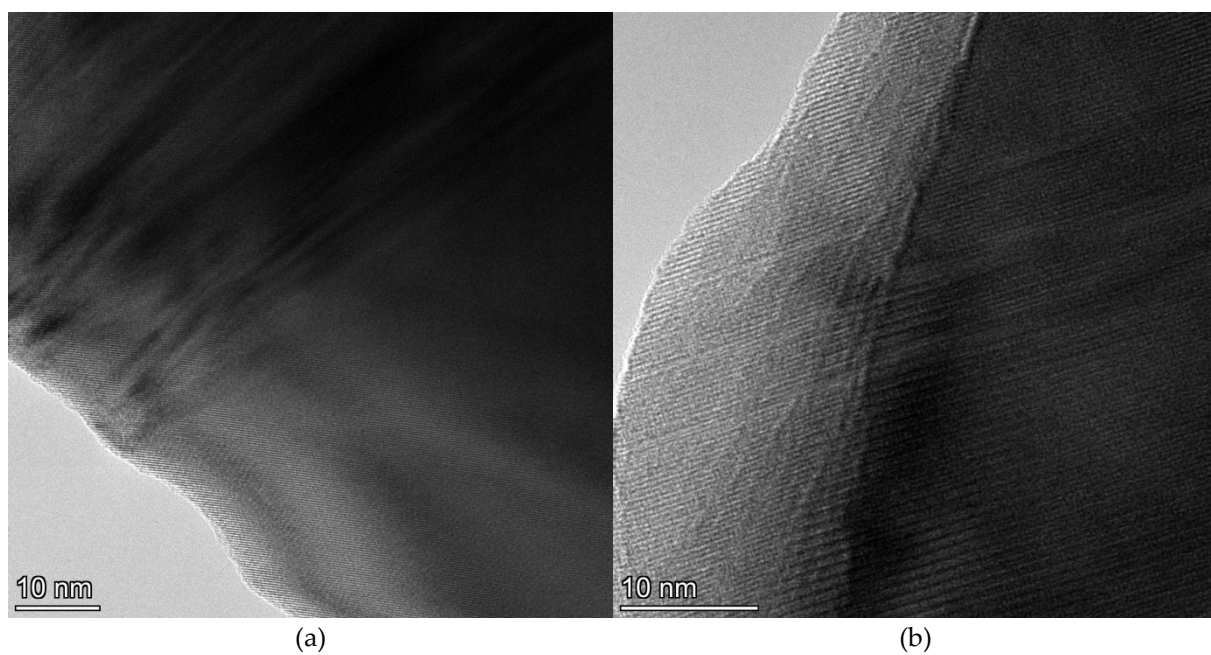

**Figure S11.** HRTEM images LCNO\_01 sample showing ordered planar defects – (a), (b).
